# Supplementary material for: Carbon nitride nanosheet/metal–organic framework nanocomposites with synergistic photocatalytic activities
Source: Royal Society of Chemistry journal article supplement (doi:10.1039/c5cy01857a), 2016-01-01
Supplement: c5cy01857a1.pdf [file c5cy01857a1.pdf]

## Supporting Information

# Carbon Nitride Nanosheet/Metal-Organic Framework

## Nanocomposites with Synergistic Photocatalytic Activities

Jindui Hong,<sup>a</sup> Chunping Chen,<sup>b</sup> Franky E. Bedoya,<sup>a</sup> Geoff H. Kelsall,<sup>a</sup> Dermot O'Hare,<sup>b</sup> and Camille Petit<sup>\*a</sup>

<sup>a</sup>*Department of Chemical Engineering, Imperial College London, South Kensington Campus, London SW7 2AZ, UK*

<sup>b</sup>*Chemistry Research Laboratory, Department of Chemistry, University of Oxford, 12 Mansfield Road, Oxford, OX1 3TA, UK*

<sup>\*</sup> E-mail: [camille.petit@imperial.ac.uk](mailto:camille.petit@imperial.ac.uk); Phone: +44 (0)20 7594 3182 (Petit C.)

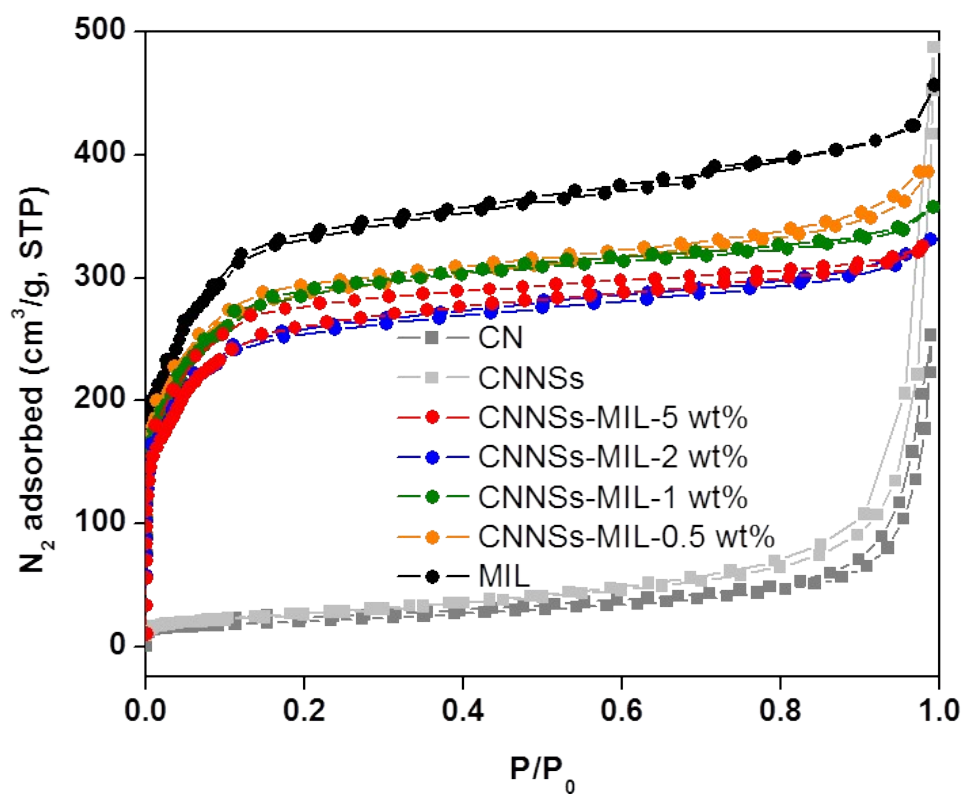

**Figure S1.**  $N_2$  isotherms of CN, CNNSs, MIL-100(Fe) and the nanocomposites of CNNSs and MIL-100(Fe) with varying contents of CNNSs. The isotherms were obtained at  $-196\text{ }^\circ\text{C}$ .

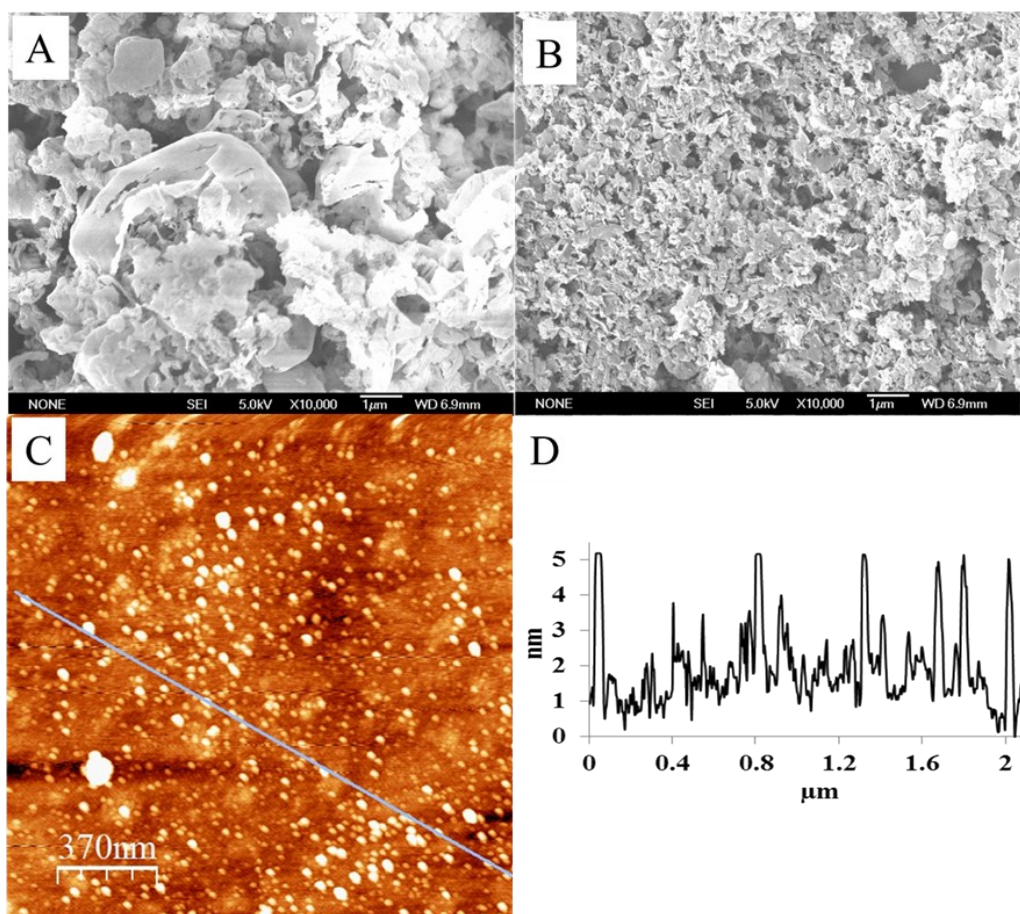

**Figure S2.** SEM images of: (A) carbon nitride and (B) CNNNs; (C) AFM image of CNNNs and (D) height profile of CNNNs.

A

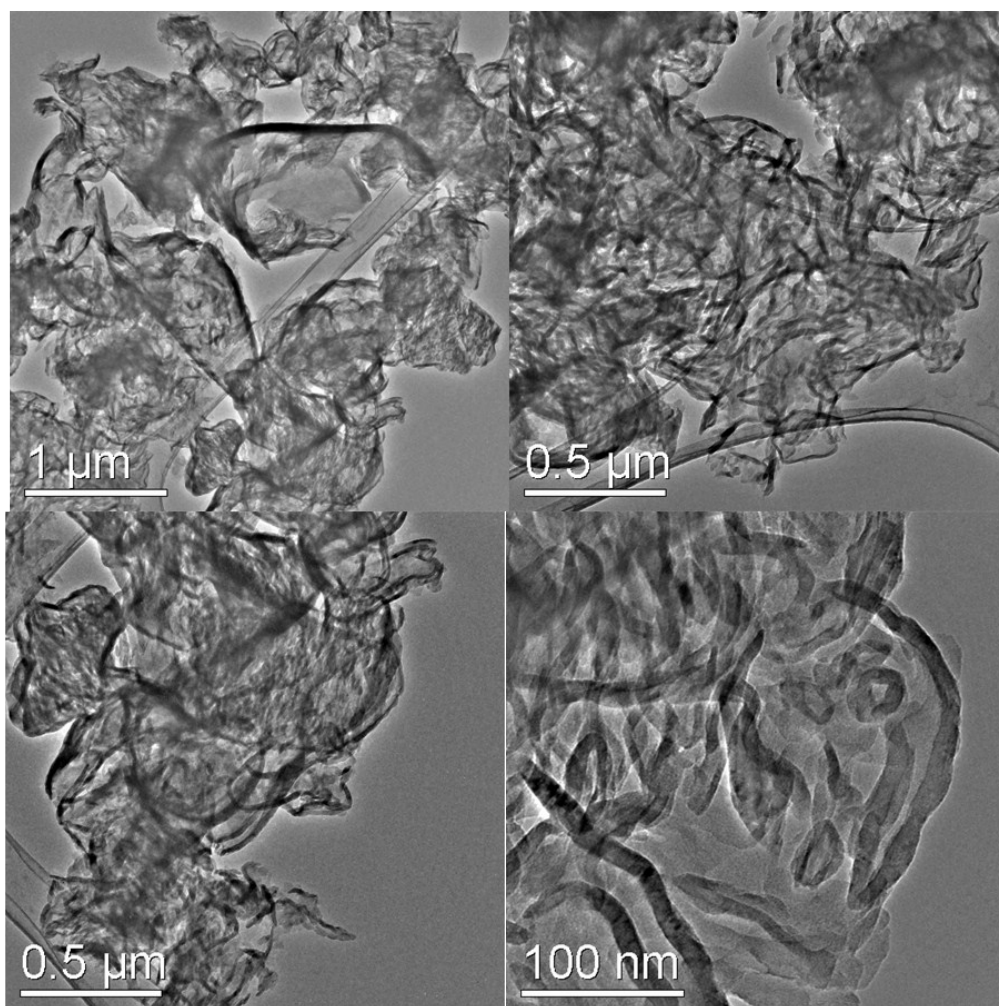

B

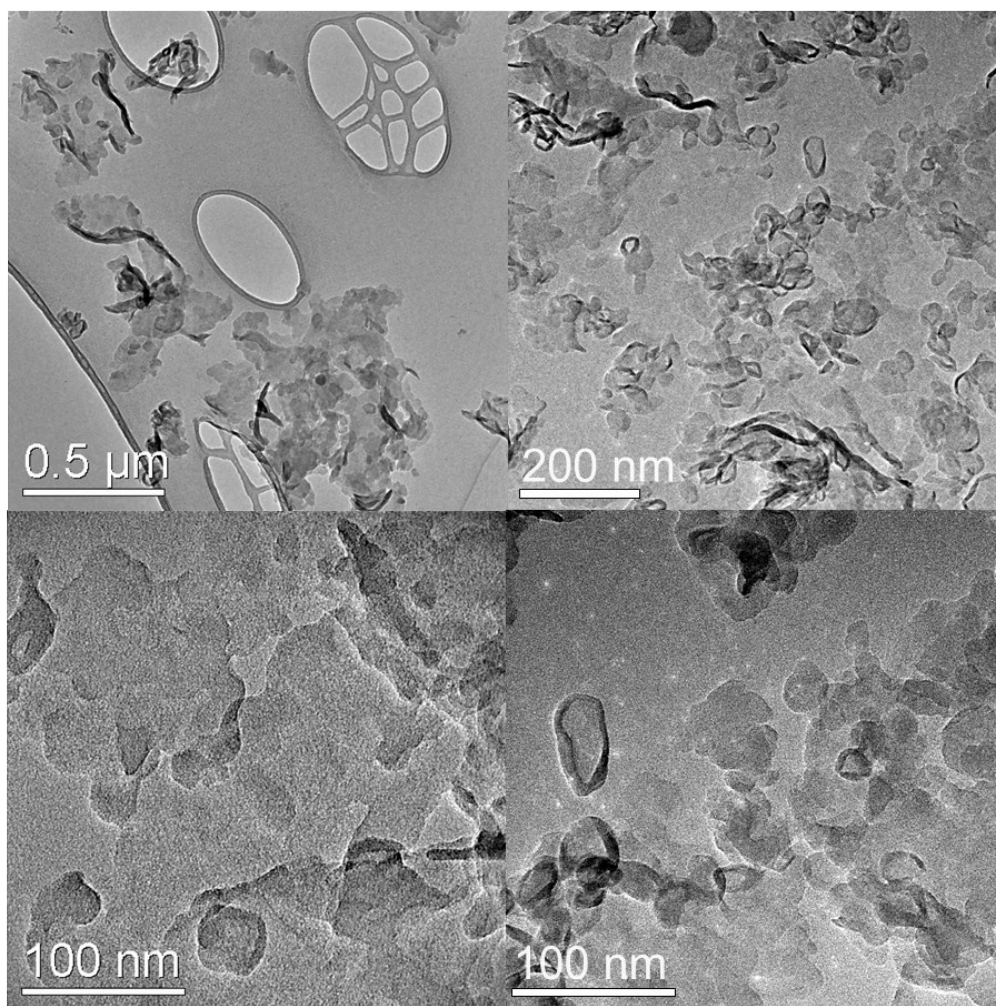

C

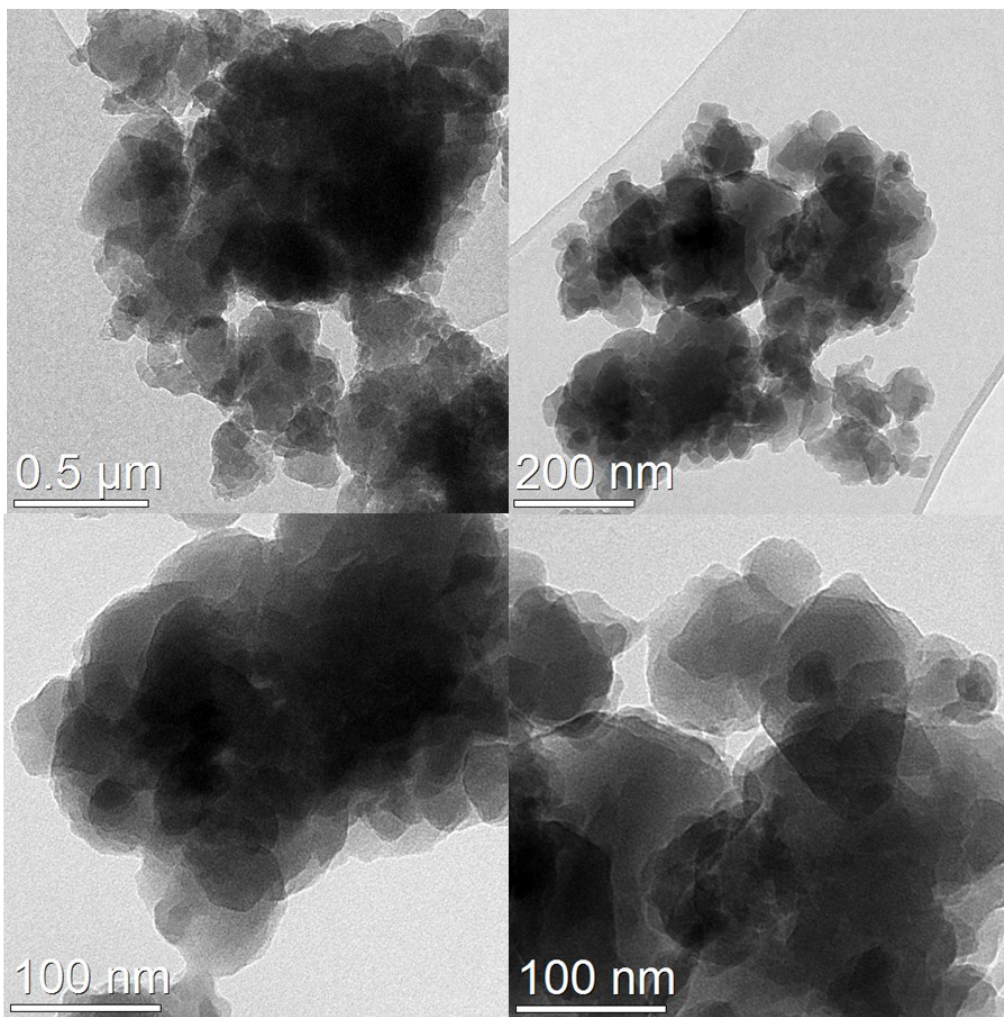



D

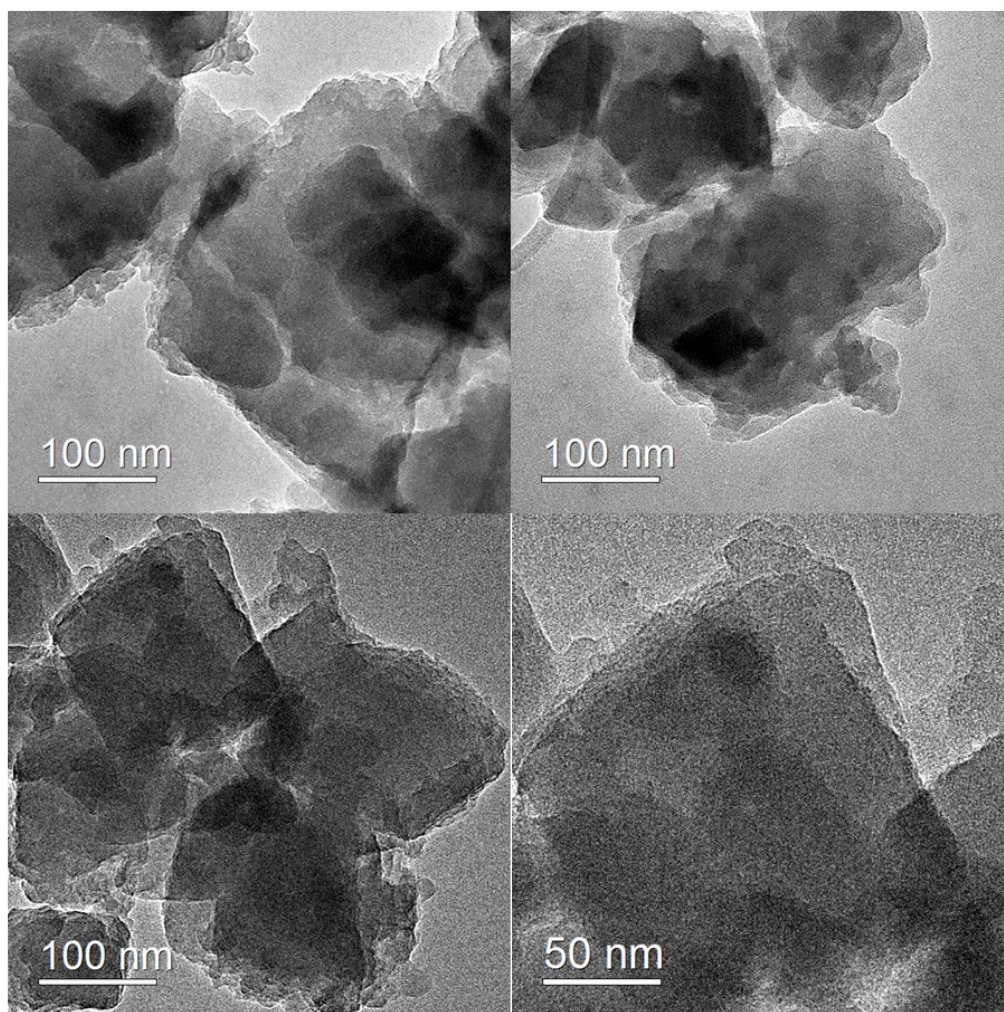

**Figure S3.** TEM images of: (A) CN, (B) CNNSs, (C) MIL and (D) CNNSs-MIL-1 wt%.

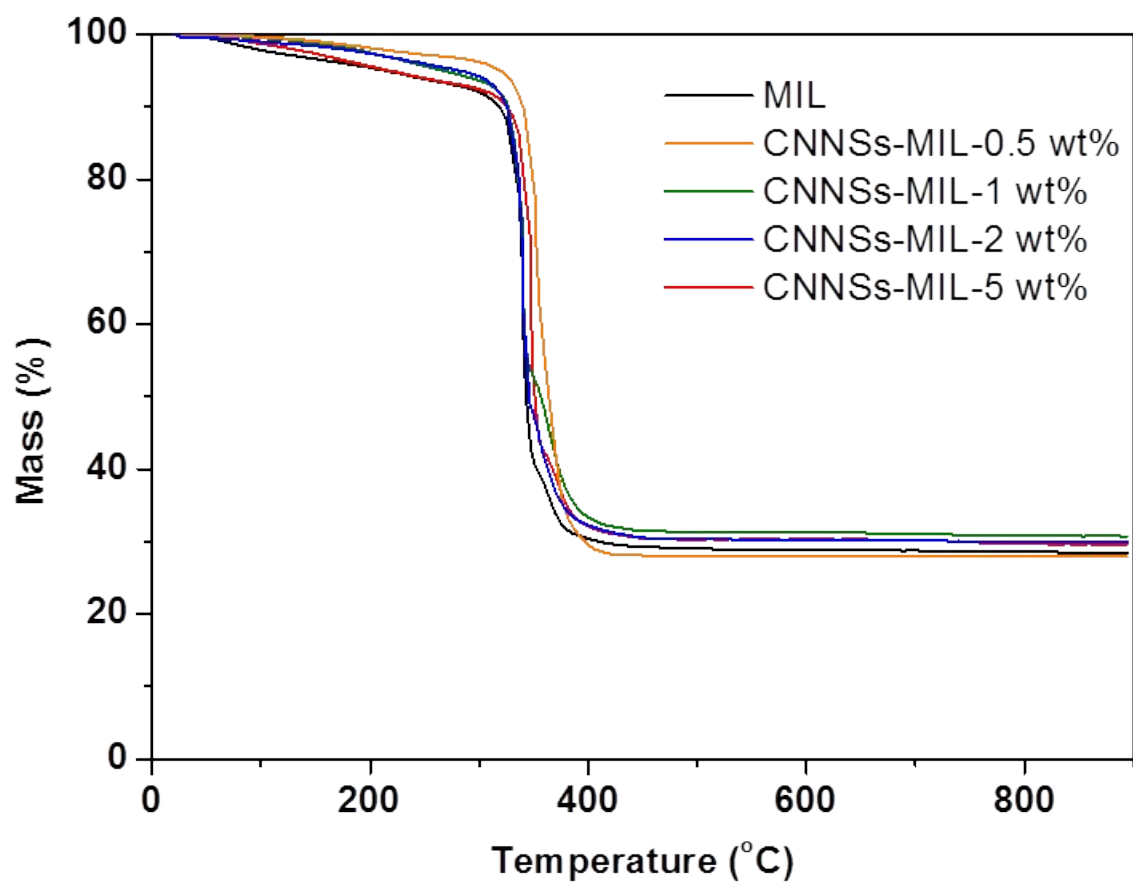

**Figure S4.** Thermogravimetric curves of MIL-100(Fe) and the nanocomposites of CNNSs and MIL-100(Fe) with varying contents of CNNSs.



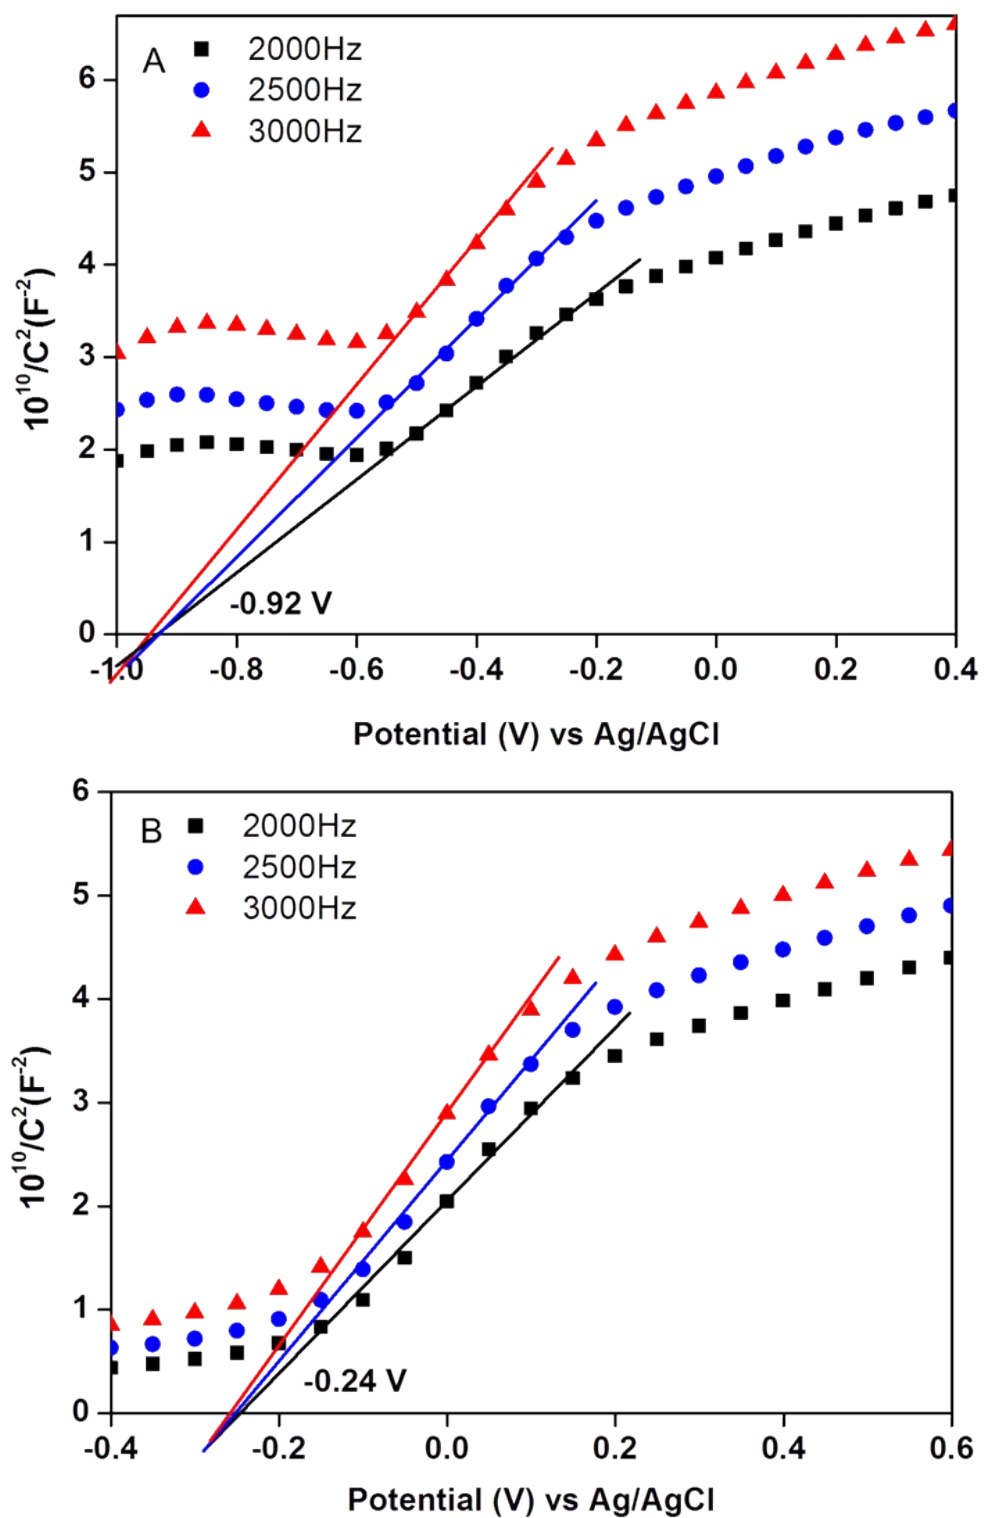

**Figure S5.** Mott-Schottky plots of (A) CNNSs and (B) MIL-100(Fe) in 0.2 M Na<sub>2</sub>SO<sub>4</sub> aqueous solution (pH = 7).
